# Supplementary material
Source: PubMed Central journal article supplement (PMC7716174)
Supplement: ajcr0010-3882-f3.pdf [file ajcr0010-3882-f3.pdf]

## Comparison of HCC incidence between entecavir and tenofovir

**Table S1.** Univariate and multivariate analyses of on-treatment factors at month 12 associated with hepatocellular carcinoma in patients treated with entecavir or TDF

| Parameters                       | Univariate Analysis |             |         | Multivariate Analysis |             |         |
|----------------------------------|---------------------|-------------|---------|-----------------------|-------------|---------|
|                                  | HR                  | 95% CI      | p Value | HR                    | 95% CI      | p Value |
| TDF vs. entecavir                | 0.585               | 0.425-0.806 | 0.001   | 0.567                 | 0.412-0.837 | 0.003   |
| ALT normalization at month 12    | 0.742               | 0.562-0.978 | 0.034   | 0.738                 | 0.551-0.990 | 0.042   |
| Undetectable HBV DNA at month 12 | 0.737               | 0.509-1.068 | 0.107   |                       |             |         |
| FIB-4 at month 12                | 1.042               | 1.031-1.054 | < 0.001 | 1.093                 | 1.074-1.113 | < 0.001 |
| AFP at month 12                  | 1.013               | 1.010-10.16 | < 0.001 | 1.012                 | 1.009-1.115 | < 0.001 |

AFP, alpha-fetoprotein; ALT, alanine aminotransferase; CI, confidence interval; FIB-4, fibrosis index based on four factors; HBV, hepatitis B virus; HR, hazard ratio; TDF, tenofovir disoproxil fumarate.

**Table S2.** Univariate and multivariate analyses of factors associated with hepatocellular carcinoma in NA-naive patients (*n* = 1353)

| Variables                            | Univariate Analysis   |         | Multivariate Analysis |         |
|--------------------------------------|-----------------------|---------|-----------------------|---------|
|                                      | Hazard ratio (95% CI) | p Value | Hazard ratio (95% CI) | p Value |
| Age (year)                           | 1.037 (1.025-1.049)   | < 0.001 | 1.041 (1.028-1.053)   | < 0.001 |
| Sex, male vs. female                 | 1.192 (0.865-1.644)   | 0.283   | 1.553 (1.119-2.156)   | 0.008   |
| HBeAg, positive vs. negative         | 1.055 (0.763-1.457)   | 0.747   |                       |         |
| Decompensation, yes vs. no           | 2.252 (1.631-3.109)   | < 0.001 | 1.626 (1.058-2.499)   | 0.027   |
| TDF vs. entecavir                    | 0.523 (0.363-0.752)   | 0.005   | 0.582 (0.401-0.843)   | 0.004   |
| Diabetes mellitus, yes vs. no        | 1.695 (1.254-2.290)   | 0.006   | 1.487 (1.099-2.013)   | 0.010   |
| Hypertension, yes vs. no             | 1.665 (1.254-2.211)   | 0.004   |                       |         |
| HBV DNA, per log <sub>10</sub> IU/mL | 1.000 (0.909-1.000)   | 0.997   |                       |         |
| AST, per U/L                         | 1.000 (0.999-1.001)   | 0.598   |                       |         |
| ALT, per U/L                         | 1.000 (0.999-1.000)   | 0.253   |                       |         |
| Total bilirubin, per mg/dL           | 0.989 (0.943-1.037)   | 0.639   |                       |         |
| Albumin, per g/L                     | 0.550 (0.448-0.675)   | < 0.001 | 0.765 (0.583-1.004)   | 0.053   |
| INR, per ratio                       | 1.301 (0.829-2.042)   | 0.253   |                       |         |
| eGFR, mL/min/1.73 m <sup>2</sup>     | 0.991 (0.986-0.996)   | < 0.001 |                       |         |
| Platelet, per 10 <sup>3</sup> /μL    | 0.993 (0.991-0.996)   | < 0.001 | 0.997 (0.994-1.000)   | 0.031   |
| AFP at baseline, per ng/mL           | 1.000 (0.999-1.001)   | 0.826   |                       |         |
| Child-Pugh score                     | 1.162 (1.078-1.253)   | < 0.001 |                       |         |
| FIB-4                                | 1.051 (1.033-1.069)   | < 0.001 |                       |         |
| APRI                                 | 1.004 (0.985-1.023)   | 0.701   |                       |         |

AFP, alpha-fetoprotein; APRI, AST to platelet ratio index; AST, aspartate aminotransferase; ALT, alanine aminotransferase; CI, confidence interval; eGFR, estimated glomerular filtration rate; FIB-4, fibrosis index based on four factors; HBV, hepatitis B virus; HBeAg, hepatitis B e antigen; INR, international normalized ratio; NA, nucleos(t)ide analogue; TDF, Tenofovir disoproxil fumarate.

## Comparison of HCC incidence between entecavir and tenofovir

**Table S3.** Univariate and multivariate analyses of factors associated with hepatocellular carcinoma in patients with compensated cirrhosis at baseline (*n* = 1320)

| Variables                            | Univariate Analysis   |                | Multivariate Analysis |                |
|--------------------------------------|-----------------------|----------------|-----------------------|----------------|
|                                      | Hazard ratio (95% CI) | <i>p</i> Value | Hazard ratio (95% CI) | <i>p</i> Value |
| Age (year)                           | 1.033 (1.020-1.045)   | < 0.001        | 1.033 (1.020-1.047)   | < 0.001        |
| Sex, male vs. female                 | 1.253 (0.882-1.780)   | 0.208          | 1.461 (1.017-2.097)   | 0.040          |
| HBeAg, positive vs. negative         | 1.207 (0.864-1.686)   | 0.270          |                       |                |
| NA-naïve, yes vs. no                 | 0.982 (0.648-1.488)   | 0.931          |                       |                |
| TDF vs. entecavir                    | 0.628 (0.438-0.900)   | 0.011          | 0.689 (0.475-0.999)   | 0.049          |
| Diabetes mellitus, yes vs. no        | 1.554 (1.120-2.156)   | 0.008          | 1.340 (0.960-1.871)   | 0.086          |
| Hypertension, yes vs. no             | 1.751 (1.300-2.358)   | < 0.001        |                       |                |
| HBV DNA, per log <sub>10</sub> IU/mL | 1.030 (0.933-1.137)   | 0.560          |                       |                |
| AST, per U/L                         | 1.000 (0.998-1.001)   | 0.555          |                       |                |
| ALT, per U/L                         | 1.000 (0.999-1.000)   | 0.326          |                       |                |
| Total bilirubin, per mg/dL           | 1.011 (0.913-1.118)   | 0.838          |                       |                |
| Albumin, per g/L                     | 0.573 (0.433-0.758)   | < 0.001        | 0.658 (0.495-0.874)   | 0.004          |
| INR, per ratio                       | 1.362 (0.773-2.400)   | 0.286          |                       |                |
| eGFR, mL/min/1.73 m <sup>2</sup>     | 0.990 (0.985-0.995)   | < 0.001        | 0.994 (0.989-1.000)   | 0.039          |
| Platelet, per 10 <sup>3</sup> /μL    | 0.995 (0.992-0.998)   | 0.001          |                       |                |
| AFP at baseline, per ng/mL           | 1.000 (0.997-1.002)   | 0.720          |                       |                |
| Child-Pugh score                     | 1.264 (1.055-1.515)   | 0.011          |                       |                |
| FIB-4                                | 1.059 (1.033-1.086)   | < 0.001        |                       |                |
| APRI                                 | 1.010 (0.976-1.046)   | 0.566          |                       |                |

AFP, alpha-fetoprotein; APRI, AST to platelet ratio index; AST, aspartate aminotransferase; ALT, alanine aminotransferase; CI, confidence interval; eGFR, estimated glomerular filtration rate; FIB-4, fibrosis index based on four factors; HBV, hepatitis B virus; HBeAg, hepatitis B e antigen; INR, international normalized ratio; NA, nucleos(t)ide analogue; TDF, Tenofovir disoproxil fumarate.

**Table S4.** Univariate and multivariate analyses of factors associated with hepatocellular carcinoma in NA-naïve patients with compensated cirrhosis at baseline (*n* = 1153)

| Variables                            | Univariate analysis   |                | Multivariate analysis |                |
|--------------------------------------|-----------------------|----------------|-----------------------|----------------|
|                                      | Hazard ratio (95% CI) | <i>p</i> value | Hazard ratio (95% CI) | <i>p</i> value |
| Age (year)                           | 1.033 (1.019-1.046)   | < 0.001        | 1.030 (1.016-1.045)   | < 0.001        |
| Sex, male vs. female                 | 1.219 (0.843-1.762)   | 0.293          | 1.474 (1.008-2.154)   | 0.045          |
| HBeAg, positive vs. negative         | 1.160 (0.808-1.666)   | 0.422          |                       |                |
| TDF vs. entecavir                    | 0.534 (0.355-0.805)   | 0.003          | 0.576 (0.379-0.877)   | 0.010          |
| Diabetes mellitus, yes vs. no        | 1.604 (1.129-2.279)   | 0.008          | 1.428 (1.003-2.035)   | 0.048          |
| Hypertension, yes vs. no             | 1.879 (1.366-2.583)   | < 0.001        |                       |                |
| HBV DNA, per log <sub>10</sub> IU/mL | 1.016 (0.909-1.136)   | 0.774          |                       |                |
| AST, per U/L                         | 1.000 (0.998-1.001)   | 0.673          |                       |                |
| ALT, per U/L                         | 0.999 (0.998-1.001)   | 0.359          |                       |                |
| Total bilirubin, per mg/dL           | 1.008 (0.904-1.123)   | 0.887          |                       |                |
| Albumin, per g/L                     | 0.584 (0.430-0.794)   | <0.001         | 0.671 (0.493-0.914)   | 0.011          |
| INR, per ratio                       | 1.199 (0.609-2.364)   | 0.599          |                       |                |
| eGFR, mL/min/1.73 m <sup>2</sup>     | 0.990 (0.984-0.995)   | < 0.001        | 0.995 (0.989-1.001)   | 0.075          |
| Platelet, per 10 <sup>3</sup> /μL    | 0.995 (0.992-0.998)   | 0.003          |                       |                |
| AFP at baseline, per ng/mL           | 1.000 (0.997-1.002)   | 0.720          |                       |                |
| Child-Pugh score                     | 1.234 (1.013-1.504)   | 0.037          |                       |                |
| FIB-4                                | 1.059 (1.032-1.087)   | < 0.001        |                       |                |

## Comparison of HCC incidence between entecavir and tenofovir

APRI 1.013 (0.973-1.054) 0.529

AFP, alpha-fetoprotein; APRI, AST to platelet ratio index; AST, aspartate aminotransferase; ALT, alanine aminotransferase; CI, confidence interval; eGFR, estimated glomerular filtration rate; FIB-4, fibrosis index based on four factors; HBV, hepatitis B virus; HBeAg, hepatitis B e antigen; INR, international normalized ratio; NA, nucleos(t)ide analogue; TDF, Tenofovir disoproxil fumarate.

**Table S5.** Univariate and multivariate analyses of factors associated with hepatocellular carcinoma in patients enrolled after 2011 (*n* = 1162)

| Variables                            | Univariate analysis   |                | Multivariate analysis |                |
|--------------------------------------|-----------------------|----------------|-----------------------|----------------|
|                                      | Hazard ratio (95% CI) | <i>p</i> value | Hazard ratio (95% CI) | <i>p</i> value |
| Age (year)                           | 1.037 (1.022-1.052)   | < 0.001        | 1.034 (1.019-1.049)   | < 0.001        |
| Sex, male vs. female                 | 1.607 (1.029-2.508)   | 0.037          | 1.902 (1.212-2.983)   | 0.005          |
| HBeAg, positive vs. negative         | 0.907 (0.589-1.397)   | 0.657          |                       |                |
| Decompensation, yes vs. no           | 0.717 (0.499-1.030)   | 0.072          |                       |                |
| NA-naïve, yes vs. no                 | 1.752 (1.193-2.573)   | 0.004          |                       |                |
| TDF vs. entecavir                    | 1.987 (1.392-2.837)   | < 0.001        |                       |                |
| Diabetes mellitus, yes vs. no        | 1.156 (1.026-1.303)   | 0.018          | 1.593 (1.082-2.345)   | 0.018          |
| Hypertension, yes vs. no             | 1.000 (0.999-1.001)   | 0.813          |                       |                |
| HBV DNA, per log <sub>10</sub> IU/mL | 1.000 (0.999-1.000)   | 0.534          |                       |                |
| AST, per U/L                         | 1.009 (0.957-1.064)   | 0.738          |                       |                |
| ALT, per U/L                         | 0.521 (0.405-0.671)   | < 0.001        |                       |                |
| Total bilirubin, per mg/dL           | 1.558 (0.938-2.588)   | 0.087          |                       |                |
| Albumin, per g/L                     | 0.987 (0.981-0.993)   | < 0.001        | 0.543 (0.421-0.699)   | < 0.001        |
| INR, per ratio                       | 0.994 (0.990-0.997)   | < 0.001        |                       |                |
| eGFR, mL/min/1.73 m <sup>2</sup>     | 0.999 (0.998-1.001)   | 0.589          |                       |                |
| Platelet, per 10 <sup>3</sup> /μL    | 1.207 (1.095-1.330)   | < 0.001        |                       |                |
| AFP at baseline, per ng/mL           | 1.049 (1.023-1.076)   | < 0.001        |                       |                |
| Child-Pugh score                     | 1.005 (0.981-1.029)   | 0.707          |                       |                |
| FIB-4                                | 1.037 (1.022-1.052)   | < 0.001        |                       |                |
| APRI                                 | 1.607 (1.029-2.508)   | 0.037          |                       |                |

AFP, alpha-fetoprotein; APRI, AST to platelet ratio index; AST, aspartate aminotransferase; ALT, alanine aminotransferase; CI, confidence interval; eGFR, estimated glomerular filtration rate; FIB-4, fibrosis index based on four factors; HBV, hepatitis B virus; HBeAg, hepatitis B e antigen; INR, international normalized ratio; NA, nucleos(t)ide analogue; TDF, Tenofovir disoproxil fumarate.

## Comparison of HCC incidence between entecavir and tenofovir

**Table S6.** Baseline characteristics of all patients adjusted by propensity score matching or inverse probability of treatment weighting

| Variables                        | Propensity score matching   |                       |                | Inverse probability of treatment weighting |                       |                |
|----------------------------------|-----------------------------|-----------------------|----------------|--------------------------------------------|-----------------------|----------------|
|                                  | Entecavir<br><i>n</i> = 545 | TDF<br><i>n</i> = 545 | <i>p</i> value | Entecavir<br><i>n</i> = 994                | TDF<br><i>n</i> = 567 | <i>p</i> value |
| Age (year)                       | 54.3 ± 11.8                 | 54.5 ± 12.9           | 0.718          | 54.9 ± 11.8                                | 55.0 ± 12.9           | 0.839          |
| Sex, male                        | 414 (78.0%)                 | 411 (75.4%)           | 0.832          | 73.8%                                      | 74.0%                 | 0.919          |
| HBeAg-positive status            | 129 (23.6%)                 | 125 (22.9%)           | 0.774          | 22.2%                                      | 22.9%                 | 0.742          |
| Decompensation status            | 55 (10.1%)                  | 57 (10.5%)            | 0.842          | 16.3%                                      | 15.7%                 | 0.766          |
| NA-naïve                         | 468 (85.9%)                 | 462 (84.8%)           | 0.608          | 86.5%                                      | 86.9%                 | 0.821          |
| Diabetes mellitus, yes           | 83 (15.2%)                  | 86 (15.8%)            | 0.802          | 20.7%                                      | 21.6%                 | 0.675          |
| Hypertension, yes                | 137 (25.1%)                 | 127 (23.3%)           | 0.480          | 26.2%                                      | 25.6%                 | 0.792          |
| HBV DNA, log <sub>10</sub> IU/mL | 5.36 ± 1.44                 | 5.37 ± 1.43           | 0.896          | 5.43 ± 1.49                                | 5.36 ± 1.44           | 0.376          |
| AST, U/L                         | 109.2 ± 221.4               | 112.7 ± 264.1         | 0.810          | 123.0 ± 247.6                              | 133.1 ± 287.3         | 0.479          |
| ALT, U/L                         | 140.6 ± 285.1               | 149.6 ± 382.8         | 0.659          | 153.4 ± 332.8                              | 154.2 ± 349.9         | 0.964          |
| Total bilirubin, mg/dL           | 1.68 ± 3.03                 | 1.58 ± 2.90           | 0.583          | 1.89 ± 3.45                                | 1.86 ± 3.37           | 0.831          |
| Albumin, g/dL                    | 4.06 ± 0.58                 | 4.07 ± 0.57           | 0.773          | 3.96 ± 0.63                                | 3.94 ± 0.64           | 0.529          |
| INR                              | 1.17 ± 0.26                 | 1.16 ± 0.23           | 0.745          | 1.19 ± 0.27                                | 1.20 ± 0.28           | 0.323          |
| eGFR, mL/min/1.73 m <sup>2</sup> | 93.8 ± 26.9                 | 94.9 ± 28.3           | 0.516          | 89.6 ± 31.1                                | 88.62 ± 42.0          | 0.626          |
| Platelet, ×10 <sup>3</sup> /μL   | 147.1 ± 53.7                | 147.9 ± 54.0          | 0.804          | 138.7 ± 58.0                               | 137.49 ± 57.0         | 0.680          |
| AFP, ng/mL                       | 24.8 ± 73.3                 | 30.8 ± 112.           | 0.297          | 33.6 ± 145.9                               | 33.8 ± 111.9          | 0.967          |
| Child-Pugh score                 | 5.54 ± 1.27                 | 5.49 ± 1.19           | 0.508          | 5.79 ± 1.50                                | 5.78 ± 1.56           | 0.896          |
| FIB-4                            | 3.77 ± 3.45                 | 3.70 ± 3.76           | 0.771          | 4.62 ± 4.82                                | 4.82 ± 5.57           | 0.470          |
| APRI                             | 2.43 ± 5.79                 | 2.60 ± 6.62           | 0.642          | 2.98 ± 6.16                                | 3.39 ± 7.66           | 0.279          |

AFP, alpha-fetoprotein; APRI, AST to platelet ratio index; AST, aspartate aminotransferase; ALT, alanine aminotransferase; eGFR, estimated glomerular filtration rate; FIB-4, fibrosis index based on four factors; HBV, hepatitis B virus; HBeAg, hepatitis B e antigen; INR, international normalized ratio; NA, nucleos(t)ide analogue; TDF, Tenofovir disoproxil fumarate.

**Table S7.** Baseline characteristics of patients with compensated cirrhosis adjusted by propensity score matching or inverse probability of treatment weighting

| Variables                        | Propensity score matching   |                       |                | Inverse probability of treatment weighting |                       |                |
|----------------------------------|-----------------------------|-----------------------|----------------|--------------------------------------------|-----------------------|----------------|
|                                  | Entecavir<br><i>n</i> = 481 | TDF<br><i>n</i> = 481 | <i>p</i> value | Entecavir<br><i>n</i> = 811                | TDF<br><i>n</i> = 509 | <i>p</i> value |
| Age (year)                       | 55.1 ± 11.7                 | 54.8 ± 13.1           | 0.791          | 55.3 ± 11.5                                | 55.2 ± 13.2           | 0.900          |
| Sex, male                        | 350 (72.7%)                 | 354 (73.6%)           | 0.771          | 73.0%                                      | 73.5%                 | 0.826          |
| HBeAg-positive status            | 112 (23.3%)                 | 108 (22.4%)           | 0.759          | 22.2%                                      | 23.4%                 | 0.600          |
| NA-naïve                         | 416 (86.4%)                 | 421 (87.5%)           | 0.632          | 87.4%                                      | 87.4%                 | 0.966          |
| Diabetes mellitus, yes           | 75 (15.6%)                  | 76 (15.8%)            | 0.929          | 20.2%                                      | 21.5%                 | 0.579          |
| Hypertension, yes                | 116 (24.1%)                 | 115 (23.9%)           | 0.940          | 26.7%                                      | 26.1%                 | 0.830          |
| HBV DNA, log <sub>10</sub> IU/mL | 5.41 ± 1.43                 | 5.37 ± 1.42           | 0.677          | 5.43 ± 1.45                                | 5.37 ± 1.44           | 0.459          |
| AST, U/L                         | 81.0 ± 129.1                | 74.9 ± 129.8          | 0.469          | 85.4 ± 140.5                               | 96.8 ± 185.7          | 0.233          |
| ALT, U/L                         | 104.0 ± 164.5               | 103.4 ± 244.9         | 0.962          | 109.4 ± 173.0                              | 116.0 ± 263.3         | 0.617          |
| Total bilirubin, mg/dL           | 1.05 ± 0.63                 | 1.02 ± 0.85           | 0.648          | 1.15 ± 1.26                                | 1.15 ± 1.19           | 0.956          |
| Albumin, g/dL                    | 4.15 ± 0.47                 | 4.16 ± 0.47           | 0.692          | 4.12 ± 0.49                                | 4.1 ± 0.53            | 0.426          |
| INR                              | 1.13 ± 0.26                 | 1.12 ± 0.14           | 0.364          | 1.13 ± 0.21                                | 1.14 ± 0.16           | 0.625          |
| eGFR, mL/min/1.73 m <sup>2</sup> | 92.4 ± 24.8                 | 94.4 ± 27.3           | 0.239          | 88.9 ± 29.1                                | 88.1 ± 41.5           | 0.689          |
| Platelet, ×10 <sup>3</sup> /μL   | 151.3 ± 53.7                | 152.7 ± 55.0          | 0.699          | 144.6 ± 56.8                               | 142.8 ± 56.3          | 0.574          |
| AFP, ng/mL                       | 21.2 ± 69.7                 | 20.9 ± 68.7           | 0.953          | 21.2 ± 62.0                                | 20.8 ± 63.4           | 0.923          |
| Child-Pugh score                 | 5.21 ± 0.56                 | 5.17 ± 0.49           | 0.299          | 5.26 ± 0.66                                | 5.3 ± 0.69            | 0.383          |

## Comparison of HCC incidence between entecavir and tenofovir

|       |             |             |       |             |             |       |
|-------|-------------|-------------|-------|-------------|-------------|-------|
| FIB-4 | 3.31 ± 2.70 | 3.15 ± 2.88 | 0.373 | 3.77 ± 3.55 | 4.04 ± 4.62 | 0.247 |
| APRI  | 1.74 ± 3.03 | 1.64 ± 3.22 | 0.635 | 1.98 ± 3.52 | 2.4 ± 5.17  | 0.102 |

AFP, alpha-fetoprotein; APRI, AST to platelet ratio index; AST, aspartate aminotransferase; ALT, alanine aminotransferase; eGFR, estimated glomerular filtration rate; FIB-4, fibrosis index based on four factors; HBV, hepatitis B virus; HBeAg, hepatitis B e antigen; INR, international normalized ratio; NA, nucleos(t)ide analogue; TDF, Tenofovir disoproxil fumarate.

**Table S8.** Baseline characteristics of patients enrolled after 2011 adjusted by propensity score matching or inverse probability of treatment weighting

| Variables                        | Propensity score matching |                |         | Inverse probability of treatment weighting |                |         |
|----------------------------------|---------------------------|----------------|---------|--------------------------------------------|----------------|---------|
|                                  | Entecavir<br>n = 466      | TDF<br>n = 466 | p value | Entecavir<br>n = 595                       | TDF<br>n = 567 | p value |
| Age (year)                       | 55.1 ± 11.7               | 54.6 ± 12.9    | 0.557   | 55.0 ± 12.0                                | 55.3 ± 12.9    | 0.608   |
| Sex, male                        | 342 (73.4%)               | 341 (73.2%)    | 0.941   | 72.9%                                      | 72.8%          | 0.969   |
| HBeAg-positive status            | 102 (21.9%)               | 104 (22.3%)    | 0.875   | 22.8%                                      | 22.4%          | 0.864   |
| Decompensation status            | 54 (11.6%)                | 52 (11.2%)     | 0.837   | 17.3%                                      | 13.4%          | 0.065   |
| NA-naïve                         | 417 (89.5%)               | 405 (86.9%)    | 0.223   | 86.8%                                      | 87.5%          | 0.719   |
| Diabetes mellitus, yes           | 86 (18.5%)                | 81 (17.4%)     | 0.669   | 20.0%                                      | 20.3%          | 0.912   |
| Hypertension, yes                | 121 (26.0%)               | 115 (24.7%)    | 0.651   | 26%                                        | 25.9%          | 0.995   |
| HBV DNA, log <sub>10</sub> IU/mL | 5.43 ± 1.42               | 5.41 ± 1.42    | 0.793   | 5.51 ± 1.45                                | 5.35 ± 1.43    | 0.063   |
| AST, U/L                         | 105.6 ± 203.9             | 106.4 ± 249.7  | 0.953   | 132.5 ± 292.9                              | 124.8 ± 276.7  | 0.641   |
| ALT, U/L                         | 130.0 ± 255.8             | 133.7 ± 332.2  | 0.846   | 168.1 ± 415.2                              | 146.5 ± 340.8  | 0.331   |
| Total bilirubin, mg/dL           | 1.66 ± 2.95               | 1.51 ± 2.63    | 0.412   | 1.75 ± 2.94                                | 1.69 ± 3.04    | 0.719   |
| Albumin, g/dL                    | 4.04 ± 0.62               | 4.06 ± 0.57    | 0.592   | 3.99 ± 0.65                                | 3.99 ± 0.62    | 0.861   |
| INR                              | 1.18 ± 0.28               | 1.16 ± 0.23    | 0.283   | 1.18 ± 0.25                                | 1.19 ± 0.27    | 0.634   |
| eGFR, mL/min/1.73 m <sup>2</sup> | 90.6 ± 27.1               | 93.1 ± 28.4    | 0.169   | 91.1 ± 31.7                                | 90.8 ± 44.1    | 0.869   |
| Platelet, ×10 <sup>3</sup> /μL   | 143.6 ± 55.2              | 146.9 ± 55.1   | 0.364   | 144.1 ± 57.6                               | 142.6 ± 57.5   | 0.666   |
| AFP, ng/mL                       | 30.5 ± 144.1              | 30.8 ± 113.8   | 0.980   | 33.9 ± 155.0                               | 33.9 ± 117.2   | 0.993   |
| Child-Pugh score                 | 5.61 ± 1.37               | 5.51 ± 1.21    | 0.288   | 5.77 ± 1.48                                | 5.66 ± 1.44    | 0.219   |
| FIB-4                            | 4.03 ± 4.13               | 3.79 ± 3.94    | 0.367   | 4.31 ± 4.45                                | 4.47 ± 5.22    | 0.569   |
| APRI                             | 2.53 ± 5.94               | 2.51 ± 6.52    | 0.963   | 2.96 ± 6.32                                | 3.08 ± 7.27    | 0.761   |

AFP, alpha-fetoprotein; APRI, AST to platelet ratio index; AST, aspartate aminotransferase; ALT, alanine aminotransferase; eGFR, estimated glomerular filtration rate; FIB-4, fibrosis index based on four factors; HBV, hepatitis B virus; HBeAg, hepatitis B e antigen; INR, international normalized ratio; NA, nucleos(t)ide analogue; TDF, Tenofovir disoproxil fumarate.

**Table S9.** Comparison of baseline characteristics of patient subgroups (n = 1560)

| Variables                        | Subgroup 1    | Subgroup 2    | Subgroup 3    | p value | p value | p value |
|----------------------------------|---------------|---------------|---------------|---------|---------|---------|
|                                  | n = 398       | n = 595       | n = 567       | 1 vs. 2 | 1 vs. 3 | 2 vs. 3 |
| Age (year)                       | 54.57 ± 11.5  | 55.89 ± 11.77 | 54.53 ± 12.9  | 0.081   | 0.952   | 0.060   |
| Sex, male                        | 305 (76.6%)   | 416 (69.9%)   | 428 (75.5%)   | 0.020   | 0.681   | 0.033   |
| HBeAg-positive status            | 87 (21.9%)    | 122 (20.5%)   | 130 (23%)     | 0.608   | 0.685   | 0.309   |
| Decompensation status            | 70 (17.6%)    | 112 (18.8%)   | 58 (10.2%)    | 0.622   | < 0.001 | < 0.001 |
| NA-naïve                         | 339 (85.2%)   | 536 (90.1%)   | 478 (84.3%)   | 0.019   | 0.711   | 0.003   |
| Diabetes mellitus, yes           | 89 (22.4%)    | 143 (24%)     | 89 (15.7%)    | 0.542   | 0.009   | < 0.001 |
| Hypertension, yes                | 104 (26.1%)   | 176 (29.6%)   | 131 (23.1%)   | 0.236   | 0.281   | 0.012   |
| HBV DNA, log <sub>10</sub> IU/mL | 5.30 ± 1.54   | 5.50 ± 1.46   | 5.37 ± 1.44   | 0.040   | 0.466   | 0.133   |
| AST, U/L                         | 128.1 ± 229.8 | 110.3 ± 203.2 | 113.1 ± 262.9 | 0.212   | 0.350   | 0.837   |
| ALT, U/L                         | 158.9 ± 305.9 | 125.9 ± 239.7 | 151.7 ± 386.1 | 0.070   | 0.748   | 0.173   |
| Total bilirubin, mg/dL           | 2.29 ± 4.38   | 1.87 ± 3.43   | 1.57 ± 2.86   | 0.107   | 0.004   | 0.103   |
| Albumin, g/dL                    | 3.88 ± 0.60   | 3.92 ± 0.68   | 4.07 ± 0.57   | 0.290   | < 0.001 | < 0.001 |

## Comparison of HCC incidence between entecavir and tenofovir

|                                  |               |               |               |         |         |         |
|----------------------------------|---------------|---------------|---------------|---------|---------|---------|
| INR                              | 1.21 ± 0.28   | 1.19 ± 0.27   | 1.17 ± 0.24   | 0.313   | 0.013   | 0.090   |
| eGFR, mL/min/1.73 m <sup>2</sup> | 85.25 ± 29.51 | 85.5 ± 30.21  | 98.04 ± 52.24 | 0.894   | < 0.001 | < 0.001 |
| Platelet, ×10 <sup>3</sup> /μL   | 122.7 ± 53.56 | 136.7 ± 56.52 | 150.4 ± 57.07 | < 0.001 | < 0.001 | < 0.001 |
| AFP, ng/mL                       | 29.11 ± 83.72 | 33.9 ± 136.8  | 31.61 ± 113.8 | 0.494   | 0.694   | 0.756   |
| Child-Pugh score                 | 5.92 ± 1.61   | 5.88 ± 1.60   | 5.49 ± 1.19   | 0.690   | < 0.001 | < 0.001 |
| FIB-4                            | 5.57 ± 5.77   | 4.83 ± 5.17   | 3.69 ± 3.86   | 0.040   | < 0.001 | < 0.001 |
| APRI                             | 3.59 ± 6.87   | 2.89 ± 6.09   | 2.59 ± 6.55   | 0.102   | 0.023   | 0.421   |

Subgroup 1: patients treated with entecavir before 2011; subgroup 2: patients treated with entecavir after 2011; subgroup 3: patients treated with TDF. AFP, alpha-fetoprotein; APRI, AST to platelet ratio index; AST, aspartate aminotransferase; ALT, alanine aminotransferase; eGFR, estimated glomerular filtration rate; FIB-4, fibrosis index based on four factors; HBV, hepatitis B virus; HBeAg, hepatitis B e antigen; INR, international normalized ratio; NA, nucleos(t)ide analogue; TDF, Tenofovir disoproxil fumarate.

**Table S10.** Comparison of baseline characteristics of patient subgroups with compensated cirrhosis (*n* = 1320)

| Variables                        | Subgroup 1<br><i>n</i> = 328 | Subgroup 2<br><i>n</i> = 483 | Subgroup 3<br><i>n</i> = 509 | <i>p</i> value<br>1 vs. 2 | <i>p</i> value<br>1 vs. 3 | <i>p</i> value<br>2 vs. 3 |
|----------------------------------|------------------------------|------------------------------|------------------------------|---------------------------|---------------------------|---------------------------|
| Age (year)                       | 54.78 ± 11.43                | 56.02 ± 11.56                | 55.09 ± 13.03                | 0.133                     | 0.724                     | 0.230                     |
| Sex, male                        | 254 (77.4%)                  | 335 (69.4%)                  | 375 (73.7%)                  | 0.011                     | 0.218                     | 0.132                     |
| HBeAg-positive status            | 71 (21.6%)                   | 106 (21.9%)                  | 112 (22%)                    | 0.919                     | 0.891                     | 0.969                     |
| NA-naïve                         | 283 (86.3%)                  | 436 (90.3%)                  | 434 (85.3%)                  | 0.079                     | 0.682                     | 0.016                     |
| Diabetes mellitus, yes           | 67 (20.4%)                   | 118 (24.4%)                  | 79 (15.5%)                   | 0.182                     | 0.0680                    | < 0.001                   |
| Hypertension, yes                | 84 (25.6%)                   | 148 (30.6%)                  | 120 (23.6%)                  | 0.120                     | 0.503                     | 0.012                     |
| HBV DNA, log <sub>10</sub> IU/mL | 5.31 ± 1.50                  | 5.51 ± 1.41                  | 5.35 ± 1.43                  | 0.060                     | 0.693                     | 0.088                     |
| AST, U/L                         | 95.83 ± 170.0                | 85.95 ± 149.9                | 74.57 ± 127.7                | 0.3950                    | 0.053                     | 0.200                     |
| ALT, U/L                         | 124.9 ± 203.9                | 100.4 ± 152.9                | 103.0 ± 241.0                | 0.065                     | 0.158                     | 0.841                     |
| Total bilirubin, mg/dL           | 1.32 ± 1.71                  | 1.15 ± 1.4                   | 1.01 ± 0.83                  | 0.132                     | 0.003                     | 0.068                     |
| Albumin, g/dL                    | 4.05 ± 0.46                  | 4.12 ± 0.52                  | 4.17 ± 0.47                  | 0.054                     | < 0.001                   | 0.102                     |
| INR                              | 1.15 ± 0.22                  | 1.14 ± 0.23                  | 1.12 ± 0.17                  | 0.505                     | 0.078                     | 0.270                     |
| eGFR, mL/min/1.73 m <sup>2</sup> | 83.88 ± 28.5                 | 84.92 ± 27.74                | 97.23 ± 51.34                | 0.605                     | < 0.001                   | < 0.001                   |
| Platelet, ×10 <sup>3</sup> /μL   | 127.35 ± 54.1                | 143.38 ± 53.27               | 155.16 ± 55.98               | < 0.001                   | < 0.001                   | < 0.001                   |
| AFP, ng/mL                       | 20.99 ± 60.48                | 22.86 ± 63.52                | 20.81 ± 68.54                | 0.675                     | 0.968                     | 0.625                     |
| Child-Pugh score                 | 5.33 ± 0.69                  | 5.28 ± 0.73                  | 5.17 ± 0.5                   | 0.301                     | 0.003                     | 0.007                     |
| FIB-4                            | 4.73 ± 4.91                  | 3.77 ± 3.25                  | 3.11 ± 2.83                  | 0.002                     | < 0.001                   | 0.001                     |
| APRI                             | 2.64 ± 4.74                  | 1.94 ± 3.5                   | 1.61 ± 3.14                  | 0.023                     | < 0.001                   | 0.117                     |

Subgroup 1: patients treated with entecavir before 2011; subgroup 2: patients treated with entecavir after 2011; subgroup 3: patients treated with TDF. AFP, alpha-fetoprotein; APRI, AST to platelet ratio index; AST, aspartate aminotransferase; ALT, alanine aminotransferase; eGFR, estimated glomerular filtration rate; FIB-4, fibrosis index based on four factors; HBV, hepatitis B virus; HBeAg, hepatitis B e antigen; INR, international normalized ratio; NA, nucleos(t)ide analogue; TDF, Tenofovir disoproxil fumarate.
